# Supplementary material
Source: PubMed Central journal article supplement (PMC3974217)
Supplement: ncomms4543-s1.pdf [file ncomms4543-s1.pdf]

## Supplementary Figure1. Characteristics of Keratoacanthoma

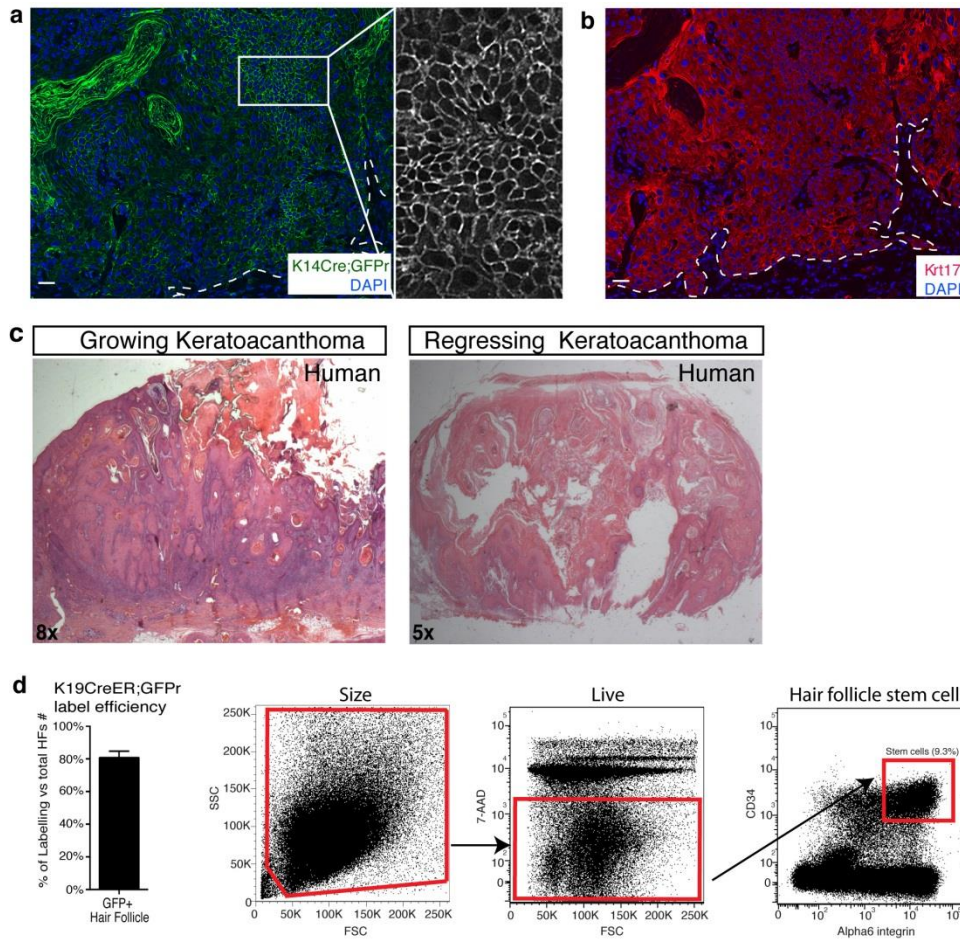

(a) *Krt14Cre;Rosa26mTmGFP* mice have been used to address the epithelial origin of KA tumors. Immunostaining for GFP (green) show the epithelial nature of KA tumor. (b) Immunofluorescence staining for the epithelial markers Krt17 (scale bar 50 $\mu$ m). Dotted lines delineate the tumor/stroma interface. DAPI (blue) labels all the nuclei.

(c) Hematoxylin and eosin stainings show histological characteristics of human KA tumors in growth and regression. (d-left panel) Quantification of the number of the hair follicles labeled in *Krt19Cre<sup>ER</sup>;Rosa26mTmGFP* mice after 10 days of tamoxifen treatment. Data are represented as mean  $\pm$  SD (n=3).

## Supplementary Figure2. HFSC-derived cells in KAs tumors

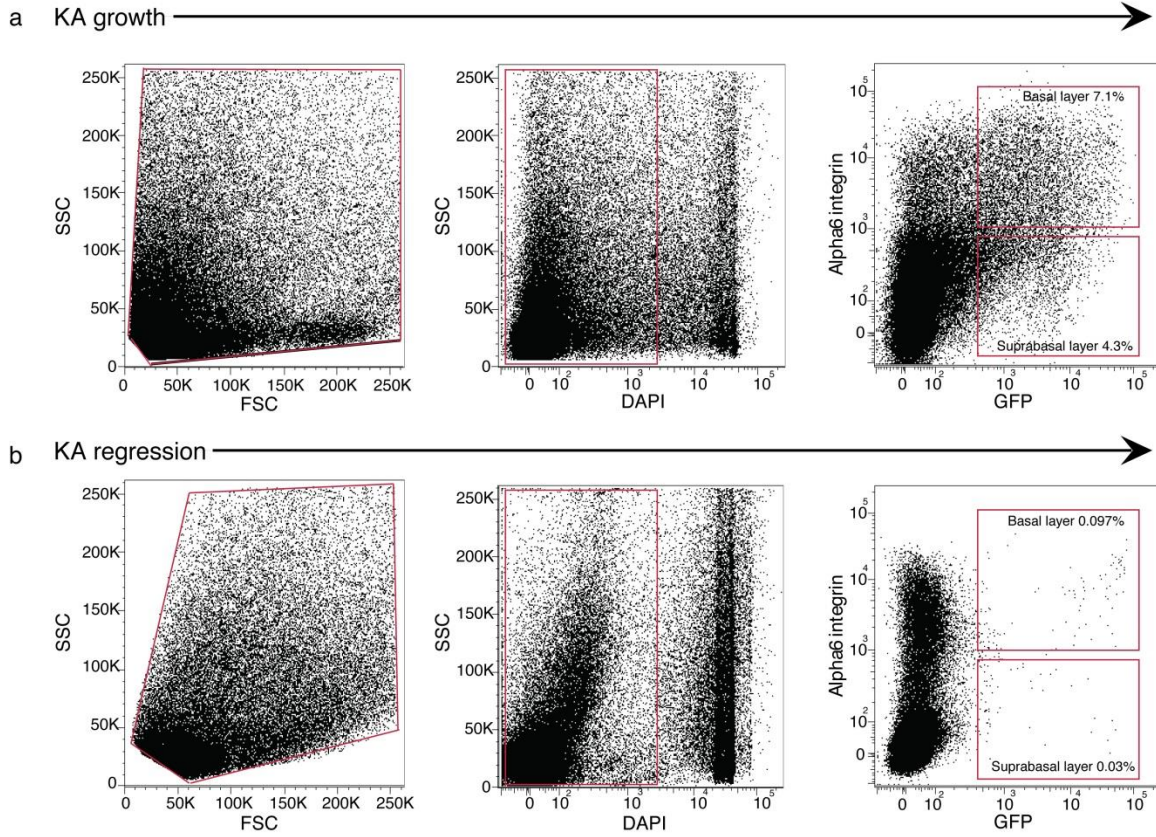

(a) Flow cytometry profile of HFSC- derived cells in growing KAs. (b) Flow cytometry profile of HFSC- derived cells in regressing KAs.

**Supplementary Figure 3. Apoptosis in KAs tumors**

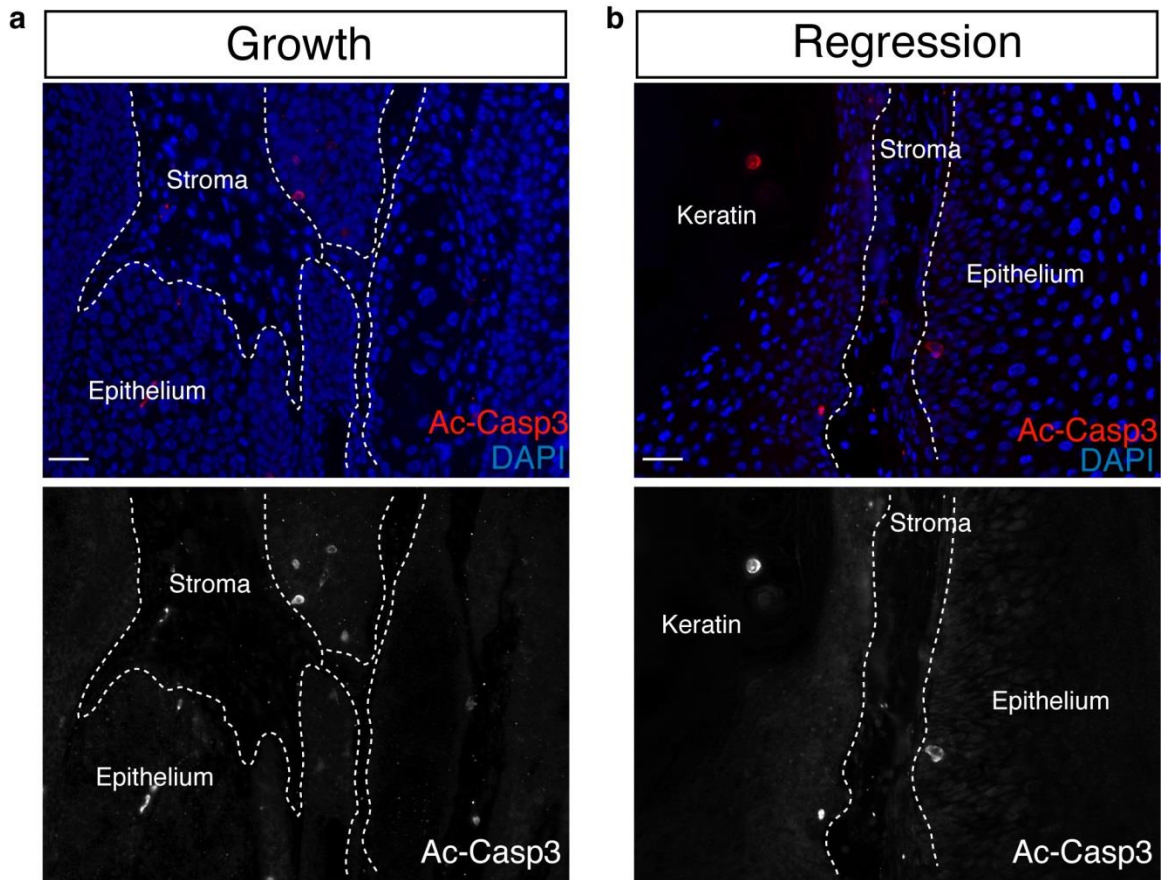

**(a-b)** Immunostaining of KA tumors with Activated caspase3 (red, and grayscale) during tumor growth and regression (scale bar 50 $\mu$ m). DAPI (blue) labels all the nuclei. Dotted lines delineate the tumor/stroma interface.

## Supplementary Figure 4. KA tumor expression pattern

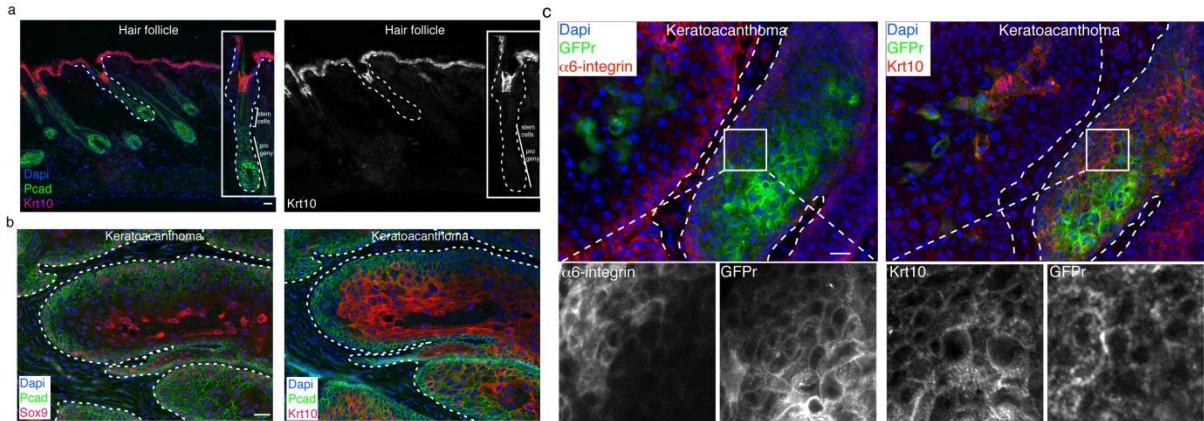

**(a)** Krt10 expression in wt anagen skin. Insets shows Krt10/Pcad co-staining in wt anagen HF. Brackets delineate the stem cells and the expanded progeny. **(b)** Expression pattern of Sox9 and Krt10 (red) in KA tumors. Green cells label the Pcad population (scale bar 50 $\mu$ m). **(c)** Expression pattern of  $\alpha 6$ -integrin and Krt10 in the HFSC-derived GFP descendants within KA tumors during the growth phase.

## Supplementary Figure 5. Wnt signaling in KA tumors

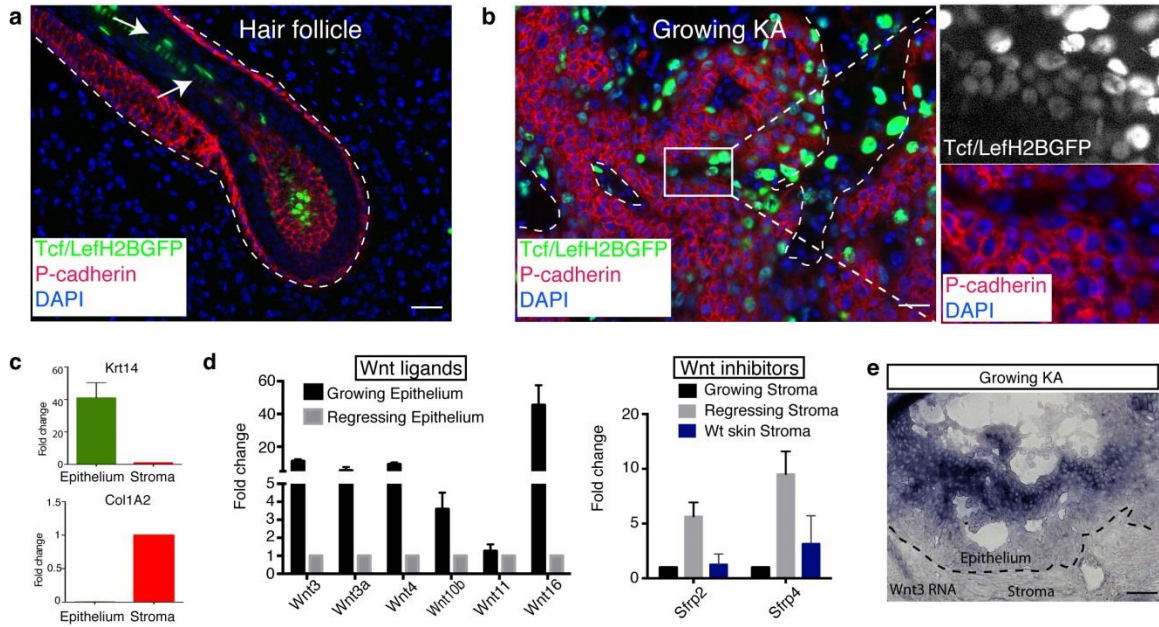

**(a)** Hair follicle from *Tcf/LefH2BGFP* reporter mice. Nuclear GFP (green) is localized in the pre-cortex and in the differentiated cells of the hair shaft (white arrows) (scale bar 50µm). Pcadherin (red) outlines the hair follicle. **(b)** Growing KA tumors from *Tcf/LefH2BGFP* reporter mice. Nuclear GFP (green) indicates Wnt activated cells. Pcadherin (red) marks undifferentiated cells (scale bar 50µm).

**(c)** qRT-PCR analysis of epithelial (*Krt14*) and stromal (*Col1A2*) transcripts in FACS sorted cells from growing KA tumors. Data are presented as mean  $\pm$  SD of three independent experiments (n=3). **(d)** qRT-PCR analysis of Wnt ligands and Wnt inhibitors in epithelial and stromal compartments of KA tumors during growth and regression. Data are presented as mean  $\pm$  SD of three independent experiments (n=3). **(e)** *In situ* hybridization for Wnt3 in growing KA tumors (n=2) (scale bar 50µm).

## Supplementary Figure 6. RNA seq validation and RA treatment

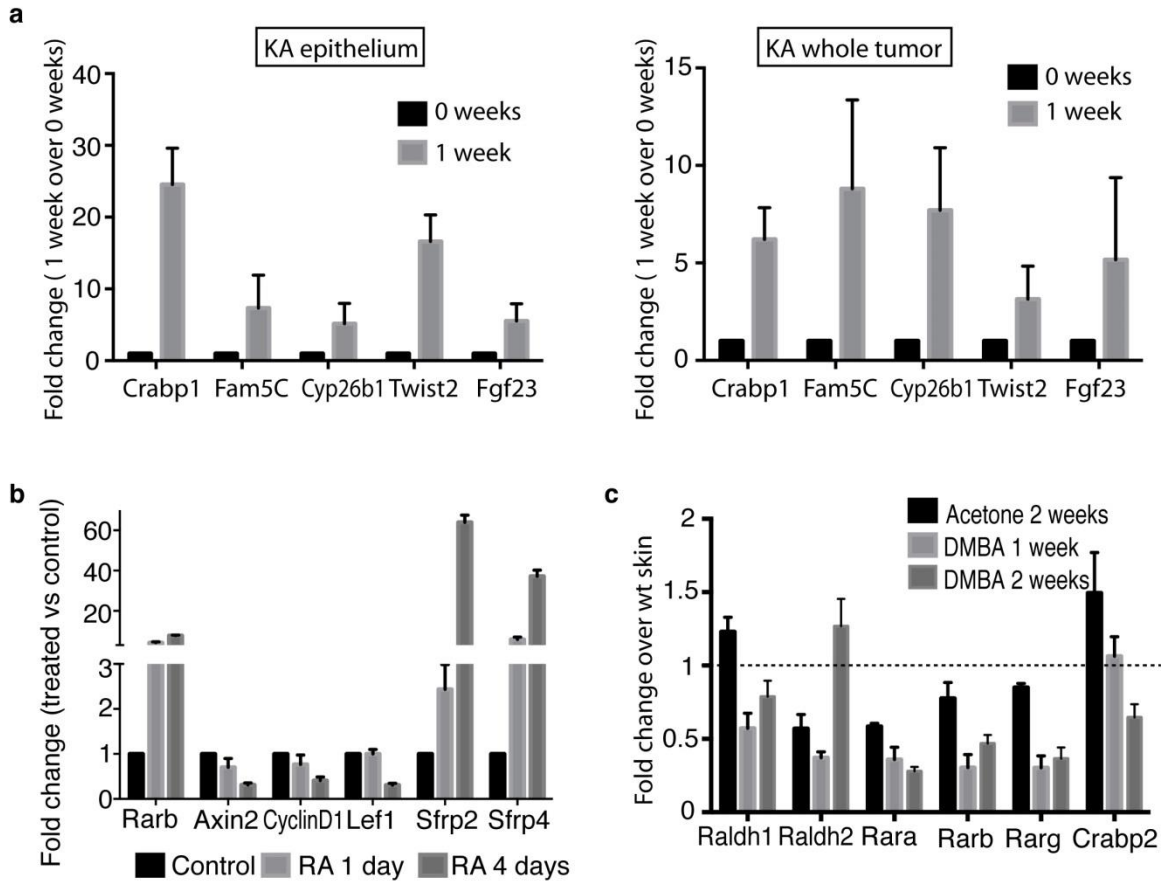

**(a)** qRT-PCR validation of the genes identified by RNA sequencing in KA epithelial cells (left panel) and whole tumor at 1 week post DMBA treatment. Data are presented as mean  $\pm$  SD of 3 independent tumors for each timepoint (n=4) **(b)** qRT-PCR of RA treated wild type keratinocytes at 1 and 4 days. Data are presented as mean  $\pm$  SD of two independent experiments (n=2). **(c)** qRT-PCR analysis of RA signaling pathway in DMBA and acetone treated skin. Data are presented as mean  $\pm$  SD of two independent experiments (n=2).

**Supplementary Figure 7. RA treatment in  $\beta$ -cat activated KAs**

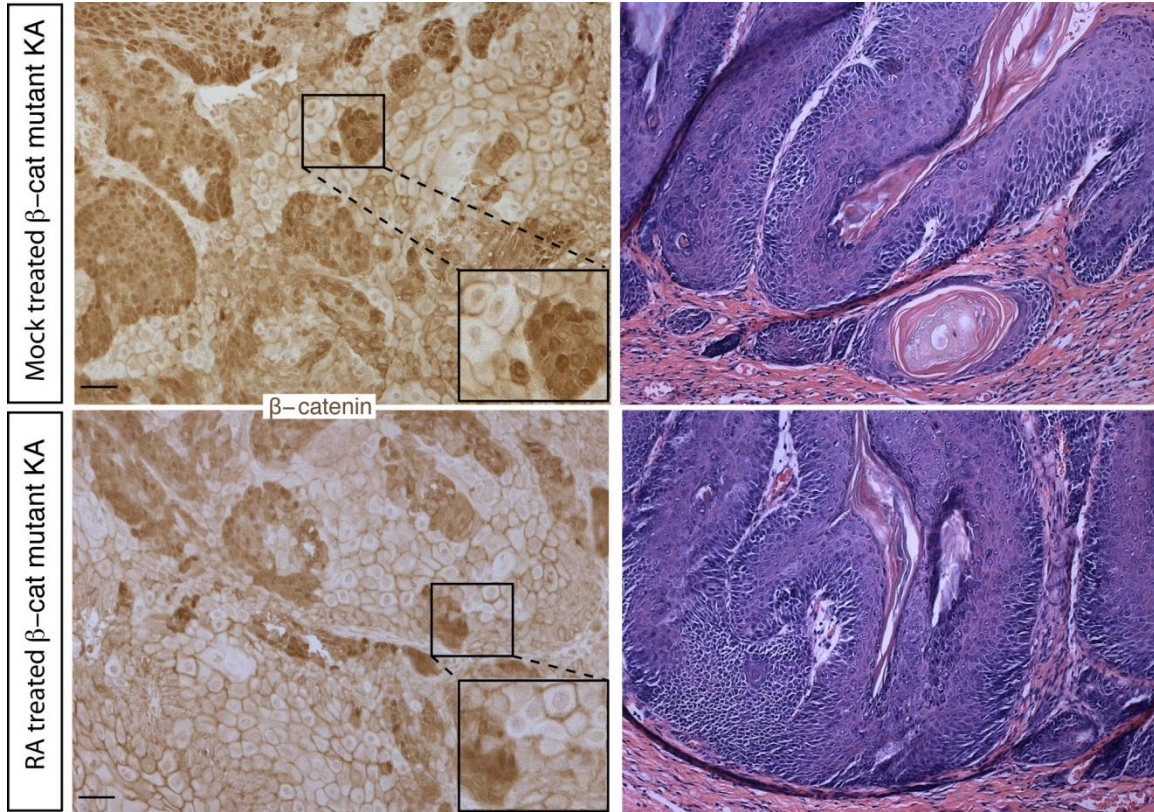

Immunohistochemistry for  $\beta$ -catenin and hematoxylin&eosin staining of  $K14Cre^{ER}; Rosa26mTmGFP; \beta$ -catn<sup>flox(Ex3)/+</sup> RA or mock treated KA tumors (scale bar 50 $\mu$ m).

## Supplementary Figure 8. RA in vivo induces SCC regression

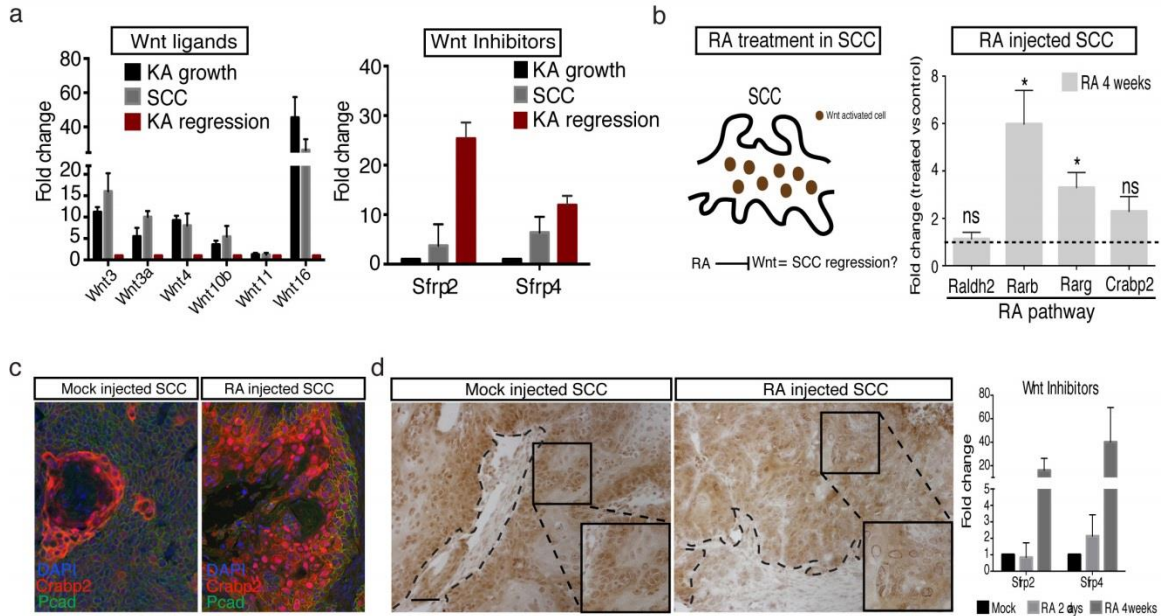

**(a)** qRT-PCR analysis of Wnt ligands and Wnt inhibitors of growing, regressing KAs and SCC tumors. Data are presented as mean  $\pm$  SD of three independent experiments (n=6).

**(b)** Schematic representation of the potential role of RA to induce SCC regression. qRT-PCR analysis of RA signaling in SCC tumors after RA treatment. Dotted line represents the normalized expression level of each gene analyzed by comparing RA-treated versus mock-treated SCCs. Data are represented as mean  $\pm$  SD (n=4) (\*<0.05, obtained by unpaired t test statistical analysis).

**(c)** Crabp2 staining in mock and RA 4 weeks post injection SCCs (scale bar 50 $\mu$ m).

**(d)** Immunohistochemistry for  $\beta$ -catenin in RA or mock treated SCC tumors (scale bar 50 $\mu$ m). **(d right panel)** qRT-PCR analysis of Wnt inhibitors in RA or mock treated SCC tumors. Data are presented as mean  $\pm$  SD of three independent experiments (n=6).



**Supplementary Table1 Genes differentially by RNA sequencing**

| <b>Gene Symbol</b> | <b>Log. Fold Change<br/>1 over 0 weeks DMBA</b> | <b>p value</b> |
|--------------------|-------------------------------------------------|----------------|
| Cox4l2             | 7.9x                                            | 0.000394669    |
| Ccl17              | 7.3x                                            | 0.00448685     |
| Crabp1             | 6.3x                                            | 0.00039136     |
| Vmn2r11            | 6.1x                                            | 0.00460318     |
| Slc19a3            | 6x                                              | 0.00726248     |
| Masp1              | 5.9x                                            | 0.000058299    |
| AU021092           | 5.9x                                            | 0.00069437     |
| Olf558             | 5.8x                                            | 0.00075273     |
| Alb                | 5.7x                                            | 0.00904593     |
| Wisp2              | 5.6x                                            | 0.000017502    |
| Mmp9               | 5x                                              | 0.000000047    |
| Sfrp2              | 4.8x                                            | 0.000037632    |
| Podnl1             | 4.7x                                            | 0.00012739     |
| Tmem132c           | 4.6x                                            | 0.000065618    |
| Gm600              | 4.5x                                            | 0.00157024     |
| Rspo3              | 4.5x                                            | 0.00065618     |
| Tceal3             | 4.3x                                            | 0.00020289     |
| 1300002K09Rik      | 4.3x                                            | 0.00397425     |
| Kcn3               | 4.2x                                            | 0.00649095     |
| Darc               | 4.1x                                            | 0.0007497      |

|               |      |             |
|---------------|------|-------------|
| Trpc6         | 4.1x | 0.00295936  |
| 4833422F24Rik | 4.1x | 0.00320924  |
| Prl2c5        | 4.1x | 0.00297716  |
| Twist2        | 4x   | 0.000088405 |
| Angptl1       | 4x   | 0.000027564 |
| Cnn1          | 4x   | 0.00177364  |
| Olfcr810      | 4x   | 0.00539585  |
| Prss35        | 4x   | 0.00230389  |
| Mmp10         | 3.8x | 0.0002076   |
| Dbc1          | 3.8x | 0.00028807  |
| Hoxa10        | 3.8x | 0.00153063  |
| F7            | 3.7x | 0.00459826  |
| Sfmbt2        | 3.7x | 0.00021844  |
| BC021767      | 3.7x | 0.00944554  |
| Pdcd1lg2      | 3.7x | 0.00261392  |
| Ppp1r14a      | 3.7x | 0.0068006   |
| Apln          | 3.6x | 0.00704978  |
| Col13a1       | 3.6x | 0.00589896  |
| Kcnip1        | 3.6x | 0.00344606  |
| a             | 3.5x | 0.00784609  |
| Tacr1         | 3.5x | 0.00154033  |
| Prokr2        | 3.5x | 0.00013168  |
| Fam174b       | 3.5x | 0.00083198  |

|            |      |            |
|------------|------|------------|
| Cacna1g    | 3.5x | 0.00023716 |
| Prr16      | 3.5x | 0.00560394 |
| Ddah1      | 3.5x | 0.0002078  |
| Dll4       | 3.4x | 0.00540425 |
| Slc38a11   | 3.4x | 0.00668297 |
| F10        | 3.4x | 0.000271   |
| Fgf23      | 3.3x | 0.0010876  |
| Erg        | 3.3x | 0.00858546 |
| Fam5c      | 3.3x | 0.00403728 |
| Sfrp4      | 3.2x | 0.00413046 |
| Stc1       | 3.2x | 0.00313585 |
| Mirg       | 3.2x | 0.00233529 |
| Ramp3      | 3.1x | 0.00629639 |
| She        | 3.1x | 0.00233529 |
| Pdlim3     | 3.1x | 0.00939842 |
| P4ha3      | 3.1x | 0.00001382 |
| Aqp5       | 3x   | 0.00300768 |
| Apcdd1     | 3x   | 0.00050177 |
| Slco5a1    | 3x   | 0.001208   |
| St6galnac3 | 3x   | 0.00591538 |
| Mustn1     | 3x   | 0.00555434 |
| Pcdh17     | 2.9x | 0.00689018 |
| Wnt2b      | 2.9x | 0.00154266 |

|               |      |            |
|---------------|------|------------|
| Slc6a17       | 2.9x | 0.00563872 |
| Usp13         | 2.8x | 0.00793107 |
| Cap2          | 2.7x | 0.00191436 |
| 5430421F17Rik | 2.7x | 0.00405703 |
| 8430408G22Rik | 2.7x | 0.00253044 |
| Ehd3          | 2.6x | 0.00180346 |
| Adam12        | 2.6x | 0.00030358 |
| Nr5a2         | 2.6x | 0.00595864 |
| Tbx3          | 2.5x | 0.00626062 |
| Rapgef4       | 2.5x | 0.00929844 |
| Fbln2         | 2.5x | 0.0015356  |
| Htr2b         | 2.5x | 0.00359735 |
| Clstn2        | 2.5x | 0.00495792 |
| Il1rn         | 2.5x | 0.00500511 |
| Igfbp3        | 2.4x | 0.00243947 |
| Sema6a        | 2.4x | 0.00379856 |
| Plln4         | 2.3x | 0.00534427 |
| Col12a1       | 2.3x | 0.004257   |
| Bpgm          | 2.2x | 0.00407281 |
| Adamts9       | 2.1x | 0.00447072 |
| 9930013L23Rik | 2.1x | 0.00713945 |
| Sdk1          | 2x   | 0.00553886 |
| Ppp1r16b      | 2x   | 0.0040297  |

|           |       |             |
|-----------|-------|-------------|
| Cyr61     | 2x    | 0.00473784  |
| Fam198b   | 2x    | 0.00727547  |
| Nr4a1     | 2x    | 0.00742337  |
| Gcnt2     | 1.9x  | 0.00768971  |
| Scd1      | -1.7x | 0.00963149  |
| Serpinb8  | -1.9x | 0.00555486  |
| Bmp2      | -2.1x | 0.00421467  |
| Dapk2     | -2.2x | 0.00848164  |
| Rwdd3     | -2.2x | 0.00830347  |
| Hddc3     | -2.4x | 0.0014926   |
| Sertad4   | -2.4x | 0.00247591  |
| Serpinb6c | -2.7x | 0.00249803  |
| Cldn1     | -3.7x | 0.000021438 |
| Jakmlp2   | -4.2x | 0.00236162  |
| Gbp1      | -5.3x | 0.000000014 |
| Rprl3     | -8.7x | 0.000007224 |

**Supplementary Table 2 List of primers used for qRT-PCR**

| <b>Primers</b>    | <b>Sequence</b>                                                      | <b>Primers</b> | <b>Sequence</b>                                                   |
|-------------------|----------------------------------------------------------------------|----------------|-------------------------------------------------------------------|
| <b>GAPDH</b>      | FW 5'-AACTTTGGCATTGTGGAAGG-3'<br>Rev 5'-ACACATTGGGGGTAGGAACA-3'      | <b>Sfrp4</b>   | FW 5'-ATCCTGGCCATCGAACAGTA-3'<br>Rev 5'-CTCTGGCCAGCTGTGGTTAT-3'   |
| <b>Krt14</b>      | FW 5'-TTGAGAGCCTCAAGGAGGAG-3'<br>Rev 5'-GTACTGATCCCGCATCTCGT-3'      | <b>Dkk1</b>    | FW 5'-TGGCCGTGTTTACAATGATG-3'<br>Rev 5'-TACTTGTTCCTCCGCCCTCATA-3' |
| <b>Krt10</b>      | FW 5'-ACGAAGAGCTGGCTACCTA-3'<br>Rev 5'-GCGTTCATTCCACATTCAC-3'        | <b>Dkk2</b>    | FW 5'-CTGGTACCCGCTGCAATAAT-3'<br>Rev 5'-CTTGGAGTGTGGCCTTCCTA-3'   |
| <b>Loricrin</b>   | FW 5'-CCTGGTGCTTCAGGGTAAC-3'<br>Rev 5'-TCCTCCACCAGAGGTCTTTC-3'       | <b>Dkk3</b>    | FW 5'-TGTGACAACCAGAGGGATG-3'<br>Rev 5'-GCTCCAGTTCACAGGTGAT-3'     |
| <b>Filaggrin</b>  | FW 5'-TTCATCAATGGGTACAAGCG-3'<br>Rev 5'-TCAGCAAGTGGGAAGGTGTA-3'      | <b>Wnt3</b>    | FW 5'-CCATCTTTGGGCCTGTCTT-3'<br>Rev 5'-ACTTCCAGCCTTCCAGGT-3'      |
| <b>Involucrin</b> | FW 5'-CCTCCTGTGAGTTTGTGG-3'<br>Rev 5'-ACCACAGCTGGAACAGTCAC-3'        | <b>Wnt3a</b>   | FW 5'-TTTGAGGCAATGGTCTCG-3'<br>Rev 5'-ACCACCAGCAGGTCTTCACT-3'     |
| <b>Ki67</b>       | FW 5'-GAGGCTCCATCTGCAGAGAC-3'<br>Rev 5'-CAGGTAGGCCAGAGCAAGTC-3'      | <b>Wnt4</b>    | FW 5'-ACTGGACTCCCTCCCTGTCT-3'<br>Rev 5'-TCACAGCCACACTTCTCCAG-3'   |
| <b>CyclinD1</b>   | FW 5'-AAGTGCCTGCAGAAGGAGAT-3'<br>Rev 5'-TTAGAGGCCACGAACATGC-3'       | <b>Wnt10b</b>  | FW 5'-TTCTCTCGGGATTTCTTGGA-3'<br>Rev 5'-CACTTCCGCTTCAGGTTTTTC-3'  |
| <b>Sox9</b>       | FW 5'-AGAGGCCACGGAACAGACT-3'<br>Rev 5'-CCCTCTCGCTTCAGATCAAC-3'       | <b>Wnt11</b>   | FW 5'-ACCTGCTTGACCTGGAGAGA-3'<br>Rev 5'-AGCCCGTAGCTGAGGTTGT-3'    |
| <b>Axin2</b>      | FW 5'-ACTGGGTGCTTCTCTTGAA-3'<br>Rev 5'-CTCCCCACCTTGAATGAAGA-3'       | <b>Wnt16</b>   | FW 5'-TGATGTCCAGTACGGCATGT-3'<br>Rev 5'-CAGGTTTTACAGCACAAGGA-3'   |
| <b>Lef-1</b>      | FW 5'-TGAAGCCTCAACACGAACAG-3'<br>Rev 5'-GCCCAGGATCTGGTTGATAG-3'      | <b>Rara</b>    | FW 5'-AGAGCAGCAGTTCGCAAGAG-3'<br>Rev 5'-CGGAAGAAGCCCTTACAGC-3'    |
| <b>c-Myc</b>      | FW 5'-AGCCCCTAGTGCTGCATGA-3'<br>Rev 5'-TCCACAGACACCACATCAATTTTC-3'   | <b>Rarb</b>    | FW 5'-ACAAGTCATCGGGCTACCAC-3'<br>Rev 5'-CTCTTTGGACATGCCCACTT-3'   |
| <b>CD44</b>       | FW 5'-TCTGCCATCTAGCACTAAGAGC-3'<br>Rev 5'-GTCTGGGTATTGAAAGGTGTAGC-3' | <b>Raldh1</b>  | FW 5'-CACCATGGATGCTTCAGAGA-3'<br>Rev 5'-ACTTTCACCATTGAGTGC-3'     |
| <b>Claud-1</b>    | FW 5'-CGAGCCTTGATGGTAATTGG-3'<br>Rev 5'-CCACTAATGTGCGCCAGACCT-3'     | <b>Raldh2</b>  | FW 5'-AGCCACAGGAGAGCAAGTGT-3'<br>Rev 5'-TGCAAGCTTGTCCAACAGAC-3'   |
| <b>Wif1</b>       | FW 5'-AATTCAGGCCGGCGTTCTAAAG-3'<br>Rev 5'-CTGCCGAAATGGAGGTAATGC-3'   | <b>Raldh3</b>  | FW 5'-ACTGGCACGAATCCAAGAGT-3'<br>Rev 5'-CTTGTCCACATCGGGCTTAT-3'   |
| <b>Sfrp1</b>      | FW 5'-CATGCAGTTCTTCGGCTTC-3'<br>Rev 5'-TCGCTTGCACAGAGATGTTC-3'       | <b>p21</b>     | FW 5'-GTACTTCCTCTGCCCTGCTG-3'<br>Rev 5'-TGCGCTTGGAGTGATAGAAA-3'   |
| <b>Sfrp2</b>      | Fw5'-AGCCTGCAAAACCAAGAATG-3'<br>Rev5'-CACTGCAGGCTGTCTTTGAG-3'        | <b>p27</b>     | FW 5'-TTGGGTCTCAGGCAAACTCT-3'<br>Rev 5'-TCTGTTCTGTGGCCCTTTT-3'    |
| <b>Sfrp3</b>      | Fw5'-CGAGCCCATTCTCATCAAGT-3'<br>Rev5'-CCCCTCTGCAGTGCCAG-3'           | <b>Crabp2</b>  | FW 5'-CCAGCAGTCGAGATCAACA-3'<br>Rev 5'-TTCCACTCTCCATTTCACC-3'     |
| <b>Wls</b>        | Fw5'-TGTTGGAGGGATTCTTCTGG-3'<br>Rev5'-CGCCAGCCATCTTGTTTTAT-3'        | <b>Cyp26b1</b> | Fw5'-CAAGATCCTACTGGGCGAAC-3'<br>Rev5'-GGGCAGGTAGCTCTCAAGTG-3'     |
| <b>Fam5C</b>      | Fw5'-AGCTGGTGTGAACTGTCTT-3'<br>Rev5'-TGTACTCCTGTGAGCGATGG-3'         | <b>Crabp1</b>  | FW5'-CTTCGAGGAGGAGACAGTGG-3'<br>Rev5'-CAGCTCTCGGGTCCAGTAAG-3'     |
| <b>Twist2</b>     | Fw5'-ACCAGTGAGGAAGAGCTGGA-3'<br>Rev5'-CTGCAGCTCCTCGAAAGACT-3'        | <b>Fgf23</b>   | FW5'-TGCTAGGGACCTGCCTTAGA-3'<br>Rev5'-GTACAGGTGGGTCAGGCTTC-3'     |

**Supplementary Table 3: Primary antibodies used for FACS, IF and IHC**

| <b>Antibody</b>     | <b>Company</b> | <b>Catalog number</b> | <b>Species</b> | <b>Dilution</b> |
|---------------------|----------------|-----------------------|----------------|-----------------|
| Ki67                | Leica          | NCL-Ki67p             | Rabbit         | 1:200           |
| Sox9                | Millipore      | AB 5535               | Rabbit         | 1:500           |
| Krt10               | Covance        | PRB-159P              | Rabbit         | 1:1000          |
| P-cadherin          | R&D            | AF761                 | Goat           | 1:100           |
| GFP                 | Abcam          | ab13970               | Chicken        | 1:1000          |
| Krt17               | Abcam          | ab53707               | Rabbit         | 1:1000          |
| $\beta$ -catenin    | BD             | 610153                | Mouse          | 1:100           |
| $\alpha$ 6-integrin | eBiosciences   | 13-0495-80            | Rat            | 1:1000          |
| Ac-Caspase3         | Cell Signaling | 9664                  | Rabbit         | 1:200           |
| Wntless             | Seven Hills    | WLAB-177              | Rabbit         | 1:500           |
| Crabp2              | Proteintech    | 10225-1-AP            | Rabbit         | 1:50            |
| CD34-A660           | eBiosciences   | 50-0341-82            | Rat            | 1:75            |
